# Supplementary material for: Optimization of Vaccination Clinics to Improve Staffing Decisions for COVID-19: A Time-Motion Study
Source: MDPI journal article supplement (doi:10.3390/vaccines10122045), 2022-11-29
Supplement: s1 [file s1]

**Table S1.** Parameter settings of resource and entity

|               | Data Distribution | Minimum | Average | Maximum | Queuing    |
|---------------|-------------------|---------|---------|---------|------------|
|               | Type              | (min)   | (min)   | (min)   | time (min) |
| <b>Large</b>  |                   |         |         |         |            |
| Preview       | Triangle          | 0.10    | 0.44    | 1.50    | 0.57       |
| Registration  | Triangle          | 0.08    | 0.39    | 2.00    | 0.15       |
| Vaccination   | Triangle          | 2.82    | 3.77    | 5.35    | 0.95       |
| <b>Medium</b> |                   |         |         |         |            |
| Preview       | Triangle          | 0.82    | 1.62    | 2.78    | 0.52       |
| Registration  | Triangle          | 1.02    | 2.19    | 3.73    | 0.38       |
| Vaccination   | Triangle          | 0.70    | 2.18    | 3.90    | 0.82       |
| <b>Small</b>  |                   |         |         |         |            |
| Preview       | Triangle          | 0.15    | 2.39    | 3.95    | 3.23       |
| Registration  | Triangle          | 0.60    | 0.99    | 1.98    | 4.47       |
| Vaccination   | Triangle          | 0.63    | 1.59    | 2.68    | 6.60       |

**Table S2.** Other parameter settings of the basic model

| Content                         | Value      |
|---------------------------------|------------|
| Working time                    | 8:00-16:00 |
| Inoculable ratio                | 99.54%     |
| Number of staff per workstation | 1          |
| Observation time (min)          | 30         |

**Table S3.** Time spent in different steps of different clinics

| Street               | Sample size | Average time (s) | Standard deviation |
|----------------------|-------------|------------------|--------------------|
| <b>Number taking</b> |             |                  |                    |
| Hefu Town            | 5           | 42.6             | 33.3               |
| Taihu Street         | 56          | 44.2             | 59.5               |
| Changshuo Street     | 75          | 63.2             | 73.1               |
| Linghu               | 9           | 141.8            | 141.6              |
| <b>Preview</b>       |             |                  |                    |
| Changshuo Street     | 88          | 40.9             | 19.4               |
| Deqing               | 62          | 107.8            | 48.1               |
| Fuxi Street          | 26          | 93.4             | 46.2               |

|                                               |     |       |       |
|-----------------------------------------------|-----|-------|-------|
| Hefu Town                                     | 36  | 174.5 | 61.8  |
| Linghu                                        | 73  | 104.6 | 61.3  |
| Taihu Street                                  | 67  | 88.3  | 109.2 |
| Wukang Street                                 | 49  | 111.2 | 46.4  |
| Shanghai Minhang<br>Gymnasium                 | 145 | 26.8  | 19.9  |
| <b>Registration</b>                           |     |       |       |
| Changshuo Street<br>(Routine<br>vaccination)  | 30  | 261.0 | 883.4 |
| Changshuo Street<br>(COVID-19<br>vaccination) | 72  | 54.6  | 28.0  |
| Deqing (Routine<br>vaccination)               | 38  | 144.0 | 90.2  |
| Fuxi Street (COVID-<br>19 vaccination)        | 21  | 92.5  | 34.3  |
| Hefu Town<br>(COVID-19<br>vaccination)        | 35  | 86.2  | 58.6  |
| Linghu (COVID-19<br>vaccination)              | 46  | 214.3 | 89.1  |
| Taihu Street<br>(Routine<br>vaccination)      | 52  | 92.3  | 80.1  |
| Taihu Street<br>(COVID-19<br>vaccination)     | 17  | 191.4 | 87.2  |
| Wukang Street<br>(Routine<br>vaccination)     | 37  | 169.2 | 82.0  |
| Shanghai Minhang<br>Gymnasium                 | 109 | 26.2  | 13.8  |
| Shanghai Songjiang<br>Gymnasium               | 174 | 24.6  | 26.3  |
| <b>Charging</b>                               |     |       |       |
| Changshuo Street                              | 52  | 51.5  | 18.6  |
| Wukang Street                                 | 34  | 48.6  | 15.2  |
| <b>Vaccination</b>                            |     |       |       |
| Changshuo Street<br>(Routine<br>vaccination)  | 26  | 242.0 | 70.2  |

|                                               |     |       |       |
|-----------------------------------------------|-----|-------|-------|
| Changshuo Street<br>(COVID-19<br>vaccination) | 56  | 83.4  | 25.1  |
| Deqing (Routine<br>vaccination)               | 55  | 230.4 | 92.8  |
| Fuxi Street (COVID-<br>19 vaccination)        | 23  | 83.6  | 21.3  |
| Hefu Town<br>(COVID-19<br>vaccination)        | 43  | 95.3  | 22.4  |
| Linghu (Routine<br>vaccination)               | 107 | 236.9 | 107.1 |
| Taihu Street<br>(COVID-19<br>vaccination)     | 60  | 163.1 | 64.3  |
| Wukang Street<br>(Routine<br>vaccination)     | 123 | 142.5 | 61.3  |
| Shanghai Minhang<br>Gymnasium                 | 282 | 88.1  | 24.0  |
| Shanghai Songjiang<br>Gymnasium               | 169 | 72.5  | 27.5  |

Table S4. Time spent of whole process in different clinics

|                                             | Sample size | Average time (s) | Standard deviation |
|---------------------------------------------|-------------|------------------|--------------------|
| Changshuo Street (Routine<br>vaccination)   | 14          | 1122.4           | 340.8              |
| Changshuo Street (COVID-<br>19 vaccination) | 31          | 255.6            | 112.2              |
| Deqing (Routine vaccination)                | 25          | 769.2            | 268.3              |
| Fuxi Street (COVID-19<br>vaccination)       | 22          | 336.0            | 64.5               |
| Hefu Town (Routine<br>vaccination)          | 2           | 839.0            | 39.6               |
| Hefu Town (COVID-19<br>vaccination)         | 39          | 445.4            | 146.5              |
| Linghu (Routine vaccination)                | 50          | 1015.5           | 380.7              |
| Taihu Street (COVID-19<br>vaccination)      | 37          | 404.2            | 235.8              |
| Wukang Street (Routine<br>vaccination)      | 21          | 1269.4           | 548.1              |

|                                 |    |       |       |
|---------------------------------|----|-------|-------|
| Shanghai Minhang<br>Gymnasium   | 65 | 296.4 | 98.7  |
| Shanghai Songjiang<br>Gymnasium | 64 | 220.3 | 123.5 |

Table S5. Queuing time at the actual vaccination clinic

| Vaccination clinic              | objective | Average queuing<br>time (s) | Average<br>queuing time | Queuing time except<br>preview step |
|---------------------------------|-----------|-----------------------------|-------------------------|-------------------------------------|
| Changshuo Street                | 45        | 806                         | 13min26s                | 5min21s                             |
| Deqing                          | 25        | 845                         | 14min5s                 | 6min12s                             |
| Fuxi Street                     | 22        | 685                         | 11min25s                | 3min42s                             |
| Hefu Town                       | 43        | 533                         | 8min53s                 | 7min26s                             |
| Linghu                          | 54        | 489                         | 8min9s                  | 6min7s                              |
| Longshan Street                 | 16        | 783                         | 13min3s                 | 3min56s                             |
| Shanghai Minhang<br>Gymnasium   | 65        | 4809                        | 80min9s                 | 9min2s                              |
| Shanghai Songjiang<br>Gymnasium | 64        | 263                         | 4min23s                 | 4min23s                             |
| Taihu Street                    | 22        | 938                         | 15min38s                | 3min30s                             |
| Wukang Street                   | 22        | 2726                        | 45min26s                | 20min47s                            |

Table S6. Optimal staffing under the target of maximum number of vaccination recipients

| Arrival<br>rate | With preview step <sup>1</sup> (Scenario 1) |         |                  |                 |                | Without preview step <sup>2</sup> (Scenario 2) |                  |                 |                |
|-----------------|---------------------------------------------|---------|------------------|-----------------|----------------|------------------------------------------------|------------------|-----------------|----------------|
|                 | Vaccination<br>recipients                   | Preview | Registra<br>tion | Vaccina<br>tion | Total<br>staff | Vaccination<br>recipients                      | Registrat<br>ion | Vaccina<br>tion | Total<br>staff |
| 55              | 37                                          | 1       | 1                | 2               | 4              | 42                                             | 1                | 2               | 3              |
| 83              | 61                                          | 1       | 1                | 2               | 4              | 72                                             | 1                | 2               | 3              |
| 105             | 104                                         | 1       | 1                | 2               | 4              | 94                                             | 1                | 2               | 3              |
| 155             | 154                                         | 1       | 2                | 2               | 5              | 149                                            | 2                | 2               | 4              |
| 209             | 205                                         | 2       | 2                | 2               | 6              | 209                                            | 2                | 2               | 4              |
| 253             | 245                                         | 2       | 2                | 3               | 7              | 224                                            | 2                | 3               | 5              |
| 309             | 301                                         | 2       | 2                | 4               | 8              | 301                                            | 2                | 3               | 5              |
| 353             | 357                                         | 3       | 2                | 4               | 9              | 320                                            | 2                | 4               | 6              |
| 405             | 370                                         | 3       | 2                | 5               | 10             | 392                                            | 2                | 4               | 6              |
| 460             | 463                                         | 3       | 2                | 5               | 10             | 457                                            | 2                | 4               | 6              |
| 503             | 493                                         | 3       | 3                | 5               | 11             | 465                                            | 3                | 5               | 8              |
| 752             | 737                                         | 4       | 3                | 5               | 13             | 720                                            | 3                | 6               | 9              |
| 1009            | 945                                         | 5       | 4                | 6               | 15             | 947                                            | 4                | 7               | 11             |
| 1253            | 1167                                        | 5       | 4                | 6               | 15             | 1177                                           | 4                | 8               | 12             |

|      |      |    |    |    |    |      |    |    |    |
|------|------|----|----|----|----|------|----|----|----|
| 1509 | 1352 | 7  | 5  | 7  | 19 | 1393 | 5  | 9  | 14 |
| 1750 | 1518 | 7  | 6  | 8  | 21 | 1582 | 6  | 10 | 16 |
| 2022 | 2073 | 7  | 6  | 8  | 21 | 2067 | 6  | 11 | 17 |
| 2524 | 2596 | 8  | 7  | 10 | 25 | 2561 | 7  | 13 | 20 |
| 3007 | 3077 | 9  | 8  | 13 | 30 | 3044 | 8  | 16 | 24 |
| 3532 | 3560 | 10 | 9  | 16 | 35 | 3596 | 9  | 18 | 27 |
| 4041 | 4096 | 11 | 10 | 18 | 39 | 4067 | 10 | 20 | 30 |
| 4540 | 4546 | 12 | 11 | 23 | 46 | 4551 | 11 | 23 | 34 |
| 5101 | 5043 | 13 | 12 | 26 | 51 | 5087 | 12 | 25 | 37 |

<sup>1</sup> With preview step: the vaccination clinic was equipped with preview, registration and vaccination steps.<sup>2</sup> Without preview step: the vaccination clinic was equipped with two steps, while the preview and registration steps were combined.

**Table S7.** Optimal staffing under the target of minimum number of staff & highest efficiency.

| Arrival rate | Minimum staff number                        |         |              |             |             |                                                |              |             |             | Highest efficiency                          |         |              |             |             |                                                |              |             |             |
|--------------|---------------------------------------------|---------|--------------|-------------|-------------|------------------------------------------------|--------------|-------------|-------------|---------------------------------------------|---------|--------------|-------------|-------------|------------------------------------------------|--------------|-------------|-------------|
|              | With preview step <sup>1</sup> (Scenario 3) |         |              |             |             | Without preview step <sup>2</sup> (Scenario 4) |              |             |             | With preview step <sup>1</sup> (Scenario 5) |         |              |             |             | Without preview step <sup>2</sup> (Scenario 6) |              |             |             |
|              | Vaccinated                                  | Preview | Registration | Vaccination | Total staff | Vaccinated                                     | Registration | Vaccination | Total staff | Vaccinated                                  | Preview | Registration | Vaccination | Total staff | Vaccinated                                     | Registration | Vaccination | Total staff |
| 55           | 31                                          | 1       | 1            | 1           | 3           | 42                                             | 1            | 1           | 2           | 31                                          | 1       | 1            | 1           | 3           | 42                                             | 1            | 1           | 2           |
| 83           | 60                                          | 1       | 1            | 1           | 3           | 67                                             | 1            | 1           | 2           | 60                                          | 1       | 1            | 1           | 3           | 67                                             | 1            | 1           | 2           |
| 105          | 104                                         | 1       | 1            | 1           | 3           | 94                                             | 1            | 1           | 2           | 104                                         | 1       | 1            | 1           | 3           | 94                                             | 1            | 1           | 2           |
| 155          | 130                                         | 1       | 1            | 1           | 3           | 133                                            | 1            | 1           | 2           | 134                                         | 1       | 1            | 1           | 3           | 133                                            | 1            | 1           | 2           |
| 209          | 184                                         | 1       | 1            | 1           | 3           | 190                                            | 1            | 1           | 2           | 160                                         | 1       | 1            | 2           | 4           | 190                                            | 1            | 1           | 2           |
| 253          | 242                                         | 1       | 2            | 2           | 5           | 224                                            | 1            | 2           | 3           | 242                                         | 2       | 2            | 2           | 6           | 224                                            | 2            | 2           | 4           |
| 309          | 298                                         | 2       | 2            | 2           | 6           | 289                                            | 2            | 2           | 4           | 189                                         | 2       | 2            | 2           | 6           | 301                                            | 2            | 2           | 4           |
| 353          | 333                                         | 2       | 2            | 2           | 6           | 306                                            | 2            | 2           | 4           | 333                                         | 2       | 2            | 3           | 7           | 306                                            | 2            | 2           | 4           |
| 405          | 360                                         | 2       | 2            | 3           | 7           | 351                                            | 2            | 3           | 5           | 206                                         | 2       | 2            | 3           | 7           | 351                                            | 2            | 2           | 4           |
| 460          | 405                                         | 2       | 2            | 3           | 7           | 418                                            | 2            | 3           | 5           | 405                                         | 2       | 2            | 3           | 7           | 418                                            | 2            | 3           | 5           |
| 503          | 498                                         | 3       | 3            | 4           | 10          | 465                                            | 3            | 4           | 7           | 498                                         | 3       | 3            | 4           | 10          | 465                                            | 3            | 4           | 7           |
| 752          | 704                                         | 3       | 4            | 5           | 12          | 720                                            | 3            | 5           | 8           | 716                                         | 3       | 4            | 5           | 12          | 720                                            | 4            | 5           | 9           |
| 1009         | 920                                         | 4       | 4            | 6           | 14          | 936                                            | 4            | 6           | 10          | 935                                         | 4       | 4            | 6           | 14          | 936                                            | 4            | 6           | 10          |
| 1253         | 1109                                        | 4       | 5            | 7           | 16          | 1105                                           | 4            | 7           | 11          | 1107                                        | 4       | 5            | 6           | 15          | 1105                                           | 5            | 6           | 11          |
| 1509         | 1315                                        | 5       | 5            | 8           | 18          | 1360                                           | 5            | 8           | 13          | 1315                                        | 5       | 5            | 8           | 18          | 1360                                           | 5            | 7           | 12          |
| 1750         | 1503                                        | 5       | 5            | 9           | 19          | 1523                                           | 6            | 9           | 15          | 1505                                        | 5       | 5            | 9           | 19          | 1532                                           | 5            | 8           | 13          |
| 2022         | 1978                                        | 6       | 6            | 10          | 22          | 2046                                           | 7            | 10          | 17          | 1978                                        | 6       | 6            | 10          | 22          | 2046                                           | 6            | 9           | 15          |
| 2524         | 2443                                        | 7       | 7            | 13          | 27          | 2527                                           | 8            | 13          | 21          | 2599                                        | 7       | 7            | 12          | 26          | 2527                                           | 7            | 11          | 18          |
| 3007         | 2901                                        | 8       | 8            | 16          | 32          | 2929                                           | 8            | 15          | 23          | 2901                                        | 9       | 8            | 14          | 31          | 2911                                           | 8            | 13          | 21          |
| 3532         | 3460                                        | 9       | 9            | 18          | 36          | 3458                                           | 8            | 17          | 25          | 3460                                        | 10      | 9            | 16          | 35          | 3458                                           | 9            | 15          | 24          |
| 4041         | 3932                                        | 10      | 10           | 20          | 40          | 3914                                           | 9            | 19          | 28          | 3990                                        | 11      | 10           | 18          | 39          | 3914                                           | 10           | 17          | 27          |
| 4540         | 4422                                        | 11      | 11           | 21          | 43          | 4461                                           | 10           | 21          | 31          | 4455                                        | 12      | 11           | 20          | 43          | 4461                                           | 11           | 19          | 30          |
| 5101         | 4923                                        | 12      | 12           | 23          | 47          | 4911                                           | 11           | 22          | 33          | 4923                                        | 13      | 12           | 22          | 47          | 4911                                           | 12           | 21          | 33          |

<sup>1</sup> With preview step: the vaccination clinic was equipped with preview, registration and vaccination steps.<sup>2</sup> Without preview step: the vaccination clinic was equipped with two steps, while the preview and registration steps were combined.

Table S8. Optimal staffing under the target of least queuing time &amp; shortest queuing number

| Arrival rate | Minimum queuing time                        |         |              |             |             |                                                |              |             |             | Minimum queuing number                      |         |              |             |             |                                                 |              |             |             |
|--------------|---------------------------------------------|---------|--------------|-------------|-------------|------------------------------------------------|--------------|-------------|-------------|---------------------------------------------|---------|--------------|-------------|-------------|-------------------------------------------------|--------------|-------------|-------------|
|              | With preview step <sup>1</sup> (Scenario 7) |         |              |             |             | Without preview step <sup>2</sup> (Scenario 8) |              |             |             | With preview step <sup>1</sup> (Scenario 9) |         |              |             |             | Without preview step <sup>2</sup> (Scenario 10) |              |             |             |
|              | Queuing time                                | Preview | Registration | Vaccination | Total staff | Queuing time                                   | Registration | Vaccination | Total staff | Queuing number                              | Preview | Registration | Vaccination | Total staff | Queuing number                                  | Registration | Vaccination | Total staff |
| 55           | 0                                           | 1       | 1            | 1           | 3           | 0                                              | 1            | 1           | 2           | 0                                           | 1       | 1            | 1           | 3           | 0                                               | 1            | 1           | 2           |
| 83           | 0.48                                        | 1       | 1            | 1           | 3           | 0                                              | 1            | 1           | 2           | 0                                           | 1       | 1            | 1           | 3           | 0                                               | 1            | 1           | 2           |
| 105          | 0                                           | 1       | 1            | 2           | 4           | 0                                              | 1            | 2           | 3           | 0                                           | 1       | 1            | 2           | 4           | 0                                               | 1            | 2           | 3           |
| 155          | 0                                           | 1       | 1            | 3           | 5           | 0                                              | 1            | 3           | 4           | 0                                           | 1       | 1            | 3           | 5           | 0                                               | 1            | 3           | 4           |
| 209          | 0                                           | 2       | 2            | 4           | 8           | 0                                              | 2            | 4           | 6           | 0                                           | 2       | 2            | 4           | 8           | 0                                               | 2            | 4           | 6           |
| 253          | 0.24                                        | 2       | 2            | 5           | 9           | 0.01                                           | 2            | 5           | 7           | 0                                           | 2       | 2            | 5           | 9           | 0                                               | 2            | 5           | 7           |
| 309          | 0.12                                        | 2       | 2            | 6           | 10          | 0.01                                           | 2            | 6           | 8           | 0                                           | 2       | 2            | 6           | 10          | 0                                               | 2            | 6           | 8           |
| 353          | 0.24                                        | 2       | 2            | 7           | 11          | 0.09                                           | 2            | 7           | 9           | 0                                           | 2       | 2            | 7           | 11          | 0                                               | 2            | 7           | 9           |
| 405          | 0.72                                        | 3       | 3            | 7           | 13          | 0.02                                           | 3            | 7           | 10          | 1                                           | 2       | 3            | 7           | 12          | 0                                               | 2            | 7           | 9           |
| 460          | 1.2                                         | 3       | 3            | 7           | 13          | 0.01                                           | 3            | 7           | 10          | 1                                           | 3       | 3            | 7           | 13          | 0                                               | 3            | 7           | 10          |
| 503          | 0                                           | 3       | 3            | 8           | 14          | 0                                              | 3            | 8           | 11          | 0                                           | 3       | 3            | 8           | 14          | 0                                               | 3            | 8           | 11          |
| 752          | 0.06                                        | 3       | 4            | 9           | 16          | 0.01                                           | 4            | 9           | 13          | 0                                           | 3       | 4            | 9           | 16          | 0                                               | 4            | 9           | 13          |
| 1009         | 0.24                                        | 4       | 4            | 10          | 18          | 0.06                                           | 4            | 10          | 14          | 0                                           | 4       | 4            | 10          | 18          | 0                                               | 4            | 10          | 14          |
| 1253         | 1.38                                        | 4       | 5            | 11          | 20          | 0.06                                           | 5            | 11          | 16          | 3                                           | 4       | 5            | 11          | 20          | 0                                               | 5            | 11          | 16          |
| 1509         | 5.34                                        | 5       | 5            | 12          | 22          | 0.27                                           | 5            | 12          | 17          | 16                                          | 5       | 5            | 12          | 22          | 1                                               | 5            | 12          | 17          |
| 1750         | 15.54                                       | 5       | 6            | 13          | 24          | 1.95                                           | 6            | 13          | 19          | 25                                          | 6       | 6            | 13          | 25          | 7                                               | 6            | 13          | 19          |
| 2022         | 0                                           | 6       | 7            | 14          | 27          | 0                                              | 7            | 14          | 21          | 0                                           | 7       | 7            | 14          | 28          | 0                                               | 7            | 14          | 21          |
| 2524         | 0                                           | 7       | 8            | 16          | 31          | 0.09                                           | 8            | 16          | 24          | 0                                           | 8       | 8            | 16          | 32          | 0                                               | 8            | 16          | 24          |
| 3007         | 0.24                                        | 8       | 10           | 18          | 36          | 0.42                                           | 10           | 18          | 28          | 1                                           | 9       | 10           | 18          | 37          | 3                                               | 9            | 18          | 27          |
| 3532         | 5.46                                        | 11      | 12           | 19          | 42          | 4.96                                           | 12           | 19          | 31          | 30                                          | 11      | 12           | 19          | 42          | 12                                              | 11           | 19          | 30          |
| 4041         | 11.64                                       | 12      | 14           | 21          | 47          | 9.88                                           | 14           | 21          | 35          | 57                                          | 12      | 14           | 21          | 47          | 14                                              | 12           | 21          | 33          |
| 4540         | 18.9                                        | 14      | 15           | 23          | 52          | 11.18                                          | 15           | 23          | 38          | 60                                          | 14      | 15           | 23          | 52          | 20                                              | 14           | 23          | 37          |
| 5101         | 25.5                                        | 15      | 16           | 25          | 56          | 13.85                                          | 16           | 25          | 41          | 81                                          | 15      | 16           | 25          | 56          | 25                                              | 15           | 25          | 40          |

<sup>1</sup> With preview step: the vaccination clinic was equipped with preview, registration and vaccination steps.<sup>2</sup> Without preview step: the vaccination clinic was equipped with two steps, while the preview and registration steps were combined.

Table S9. Service utilization for optimal staffing for each purpose.

| Arrival rate | With preview step <sup>1</sup> |             |                        |             |                        |             | Without preview step <sup>2</sup> |             |                        |             |                        |             |
|--------------|--------------------------------|-------------|------------------------|-------------|------------------------|-------------|-----------------------------------|-------------|------------------------|-------------|------------------------|-------------|
|              | Maximum vaccination recipients |             | Minimum staff number   |             | Highest efficiency     |             | Maximum vaccination recipients    |             | Minimum staff number   |             | Highest efficiency     |             |
|              | Vaccination recipients         | Utilization | Vaccination recipients | Utilization | Vaccination recipients | Utilization | Vaccination recipients            | Utilization | Vaccination recipients | Utilization | Vaccination recipients | Utilization |
| 55           | 37                             | 0.68        | 31                     | 0.57        | 31                     | 0.57        | 42                                | 0.77        | 42                     | 0.77        | 42                     | 0.77        |
| 83           | 61                             | 0.74        | 60                     | 0.73        | 60                     | 0.73        | 72                                | 0.87        | 67                     | 0.81        | 67                     | 0.81        |
| 105          | 104                            | 1           | 104                    | 1           | 104                    | 1           | 94                                | 0.9         | 94                     | 0.9         | 94                     | 0.9         |
| 155          | 154                            | 1           | 130                    | 0.84        | 134                    | 0.87        | 149                               | 0.97        | 133                    | 0.86        | 133                    | 0.86        |
| 209          | 205                            | 0.99        | 184                    | 0.88        | 160                    | 0.77        | 209                               | 1           | 190                    | 0.91        | 190                    | 0.91        |
| 253          | 245                            | 0.97        | 242                    | 0.96        | 242                    | 0.96        | 224                               | 0.89        | 224                    | 0.89        | 224                    | 0.89        |
| 309          | 301                            | 0.98        | 298                    | 0.97        | 280                    | 0.91        | 301                               | 0.98        | 289                    | 0.94        | 301                    | 0.98        |
| 353          | 357                            | 1.02        | 333                    | 0.95        | 333                    | 0.95        | 320                               | 0.91        | 306                    | 0.87        | 306                    | 0.87        |
| 405          | 370                            | 0.92        | 360                    | 0.89        | 400                    | 0.99        | 392                               | 0.97        | 351                    | 0.87        | 351                    | 0.87        |
| 460          | 463                            | 1.01        | 405                    | 0.88        | 405                    | 0.88        | 457                               | 1           | 418                    | 0.91        | 418                    | 0.91        |
| 503          | 493                            | 0.98        | 498                    | 0.99        | 498                    | 0.99        | 465                               | 0.93        | 465                    | 0.93        | 465                    | 0.93        |
| 752          | 737                            | 0.98        | 704                    | 0.94        | 716                    | 0.96        | 720                               | 0.96        | 720                    | 0.96        | 720                    | 0.96        |
| 1009         | 945                            | 0.94        | 920                    | 0.92        | 935                    | 0.93        | 947                               | 0.94        | 936                    | 0.93        | 936                    | 0.93        |

|      |      |      |      |      |      |      |      |      |      |      |      |      |
|------|------|------|------|------|------|------|------|------|------|------|------|------|
| 1253 | 1167 | 0.94 | 1109 | 0.89 | 1107 | 0.89 | 1177 | 0.94 | 1105 | 0.89 | 1105 | 0.89 |
| 1509 | 1352 | 0.9  | 1315 | 0.88 | 1315 | 0.88 | 1393 | 0.93 | 1360 | 0.91 | 1360 | 0.91 |
| 1750 | 1518 | 0.87 | 1503 | 0.86 | 1505 | 0.86 | 1582 | 0.91 | 1523 | 0.87 | 1532 | 0.88 |
| 2022 | 2073 | 1.03 | 1978 | 0.98 | 1978 | 0.98 | 2067 | 1.03 | 2046 | 1.02 | 2046 | 1.02 |
| 2524 | 2596 | 1.03 | 2443 | 0.97 | 2599 | 1.03 | 2561 | 1.02 | 2527 | 1.01 | 2527 | 1.01 |
| 3007 | 3077 | 1.03 | 2901 | 0.97 | 2901 | 0.97 | 3044 | 1.02 | 2929 | 0.98 | 2911 | 0.97 |
| 3532 | 3560 | 1.01 | 3460 | 0.98 | 3460 | 0.98 | 3596 | 1.02 | 3458 | 0.98 | 3458 | 0.98 |
| 4041 | 4096 | 1.02 | 3932 | 0.98 | 3990 | 0.99 | 4067 | 1.01 | 3914 | 0.97 | 3914 | 0.97 |
| 4540 | 4546 | 1.01 | 4422 | 0.98 | 4455 | 0.99 | 4551 | 1.01 | 4461 | 0.99 | 4461 | 0.99 |
| 5101 | 5043 | 0.99 | 4923 | 0.97 | 4923 | 0.97 | 5087 | 1    | 4911 | 0.97 | 4911 | 0.97 |

<sup>1</sup> With preview step: the vaccination clinic was equipped with preview, registration and vaccination steps.<sup>2</sup> Without preview step: the vaccination clinic was equipped with two steps, while the preview and registration steps were combined.

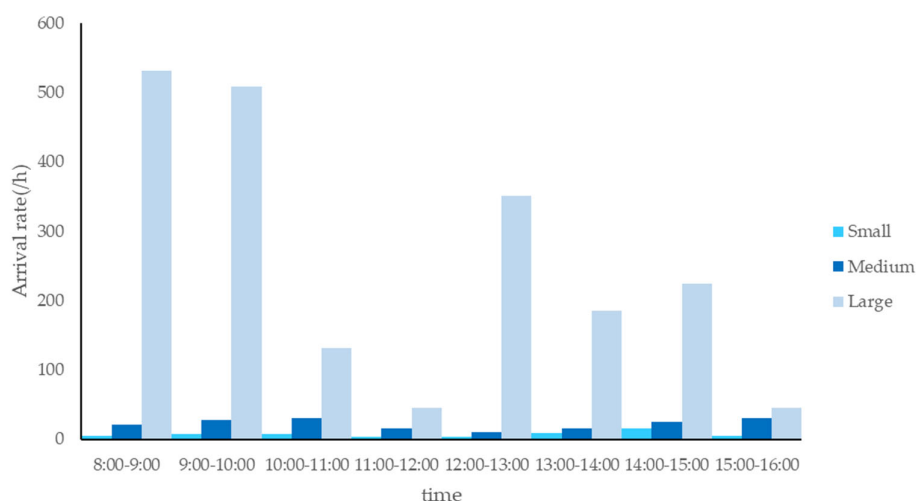

**Figure S1.** Arrival rate of representative clinics

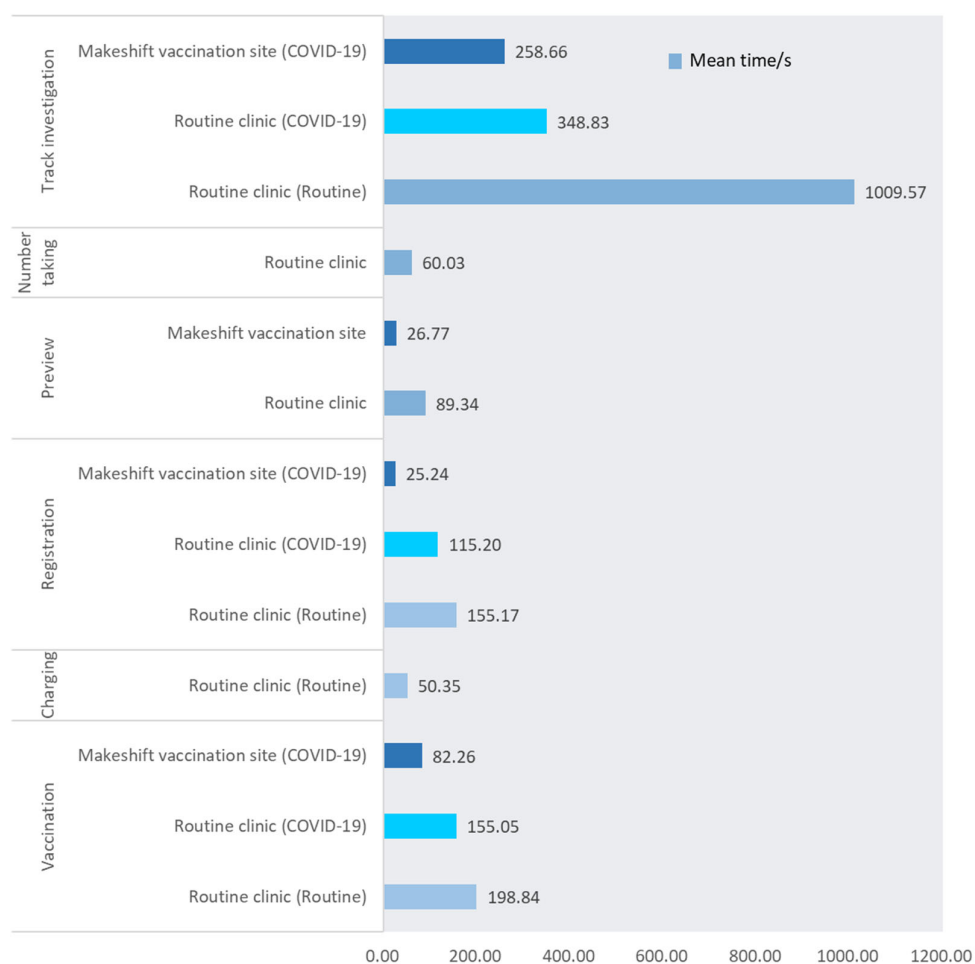

**Figure S2.** Time spent in each step in each clinic



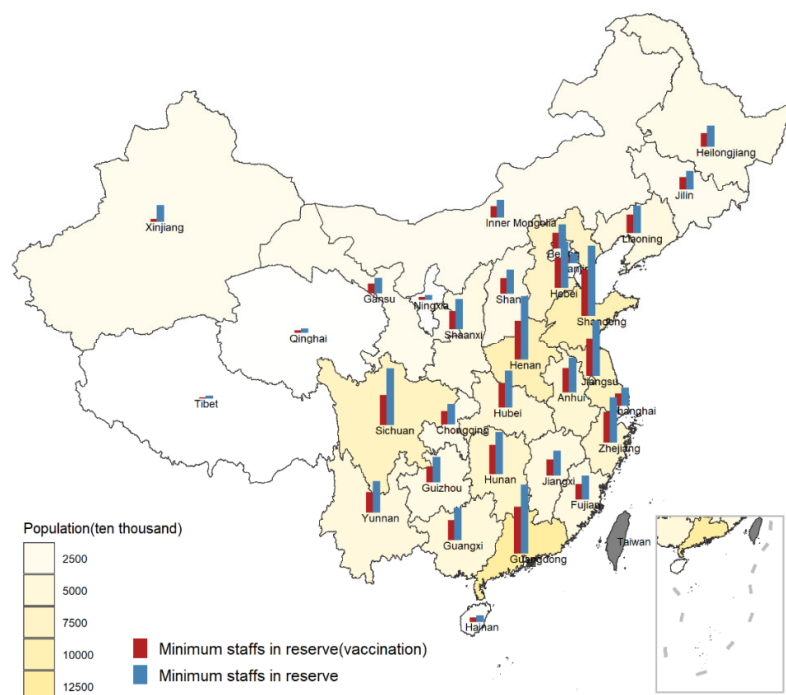

**Figure S3.** Distribution of the number of population and staffs by province. The yellow area represented the resident population in each province, with darker colors indicating a larger population. The blue and red bars indicated the total number of staff currently available as vaccination clinic staff and the total number of vaccination step staff in each province, respectively, with higher bars representing larger numbers.

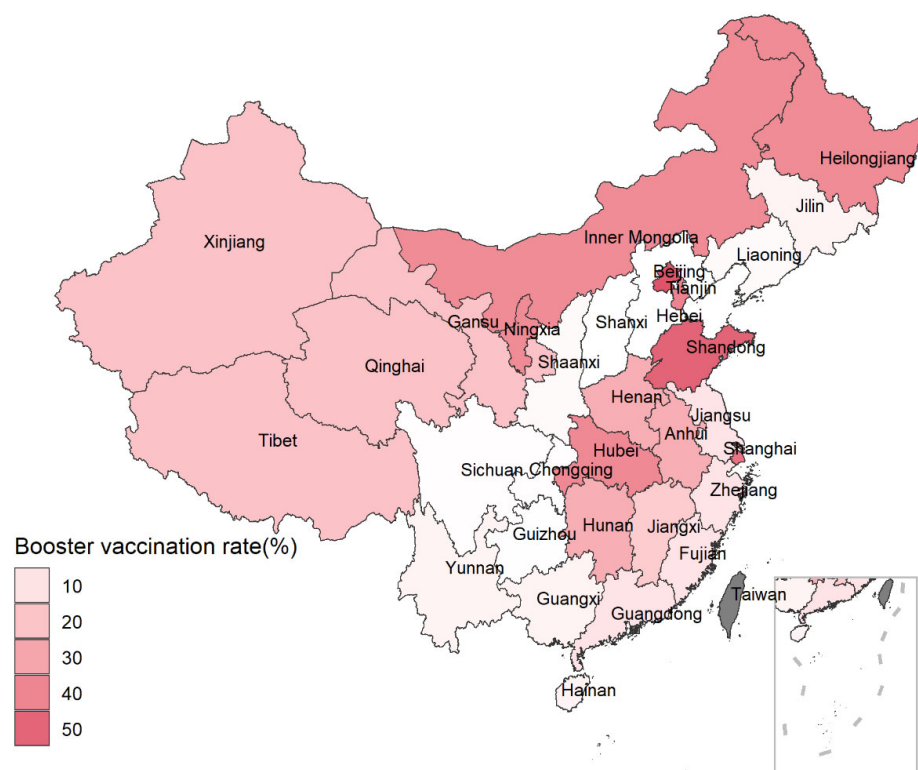

**Figure S4.** Booster vaccination rate by province. The red area indicated the vaccination rate of booster shots in each province; the darker the color, the higher the vaccination rate.

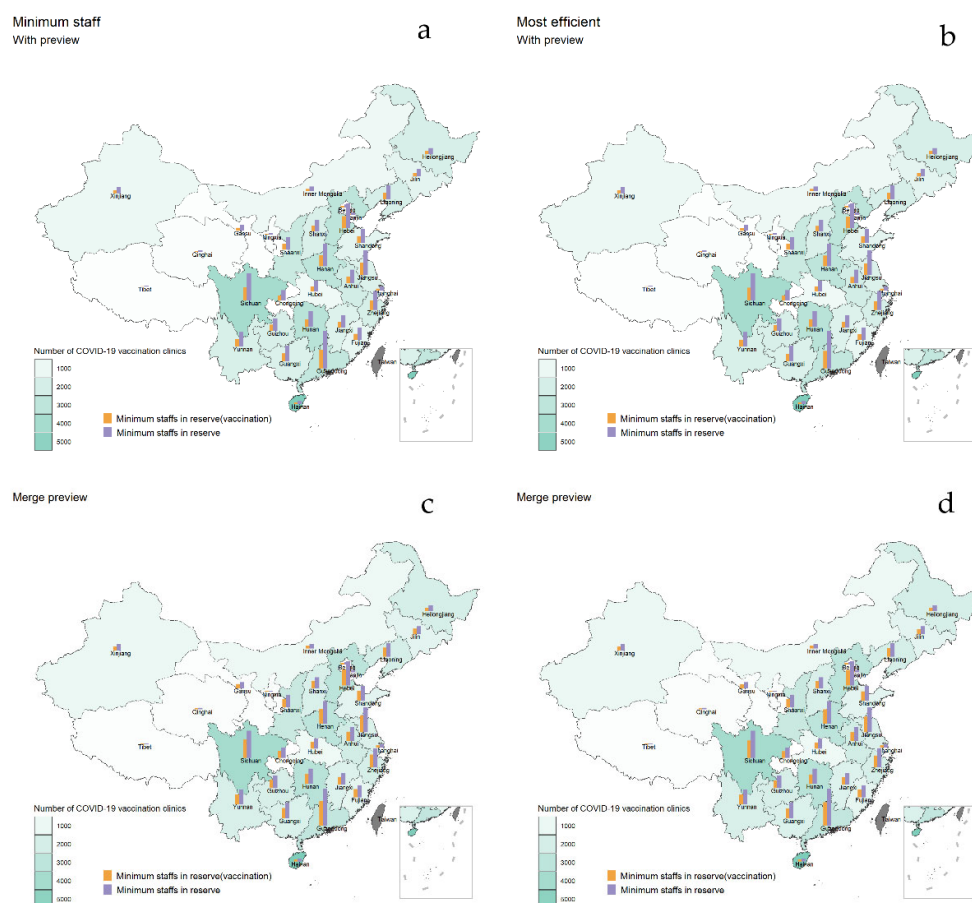

**Figure S5.** Optimal staffing to achieve the goals within 6 months. The green area in the map represented the number of COVID-19 vaccination clinics in each province, the darker the color the more COVID-19 vaccination clinics. The orange bar represented the minimum number of staff needed to be stockpiled for the vaccination step at the vaccination clinics optimized by the simulation model under the goal of raising the booster vaccination rate to the full immunization level in 3 months in different scenarios. The higher the bar, the more people needed to be stocked. The purple bar represented the minimum number of staff to be stocked in the vaccination clinic, and the higher the bar, the higher the number of staff to be stocked. **(a,b)** Optimization when the vaccination clinic was equipped with preview, registration and vaccination steps; **(c,d)** Optimization when the preview and registration steps were combined.

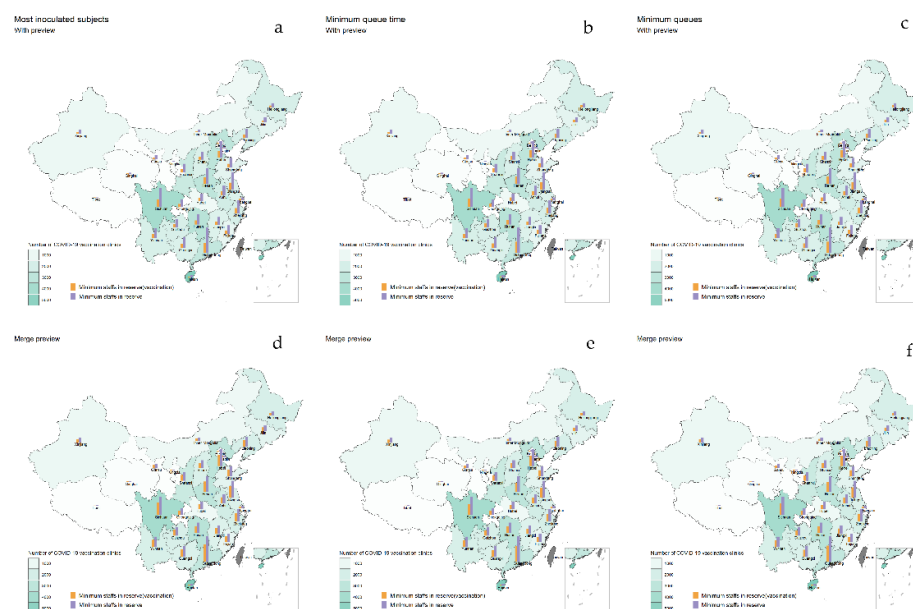

**Figure S6.** Optimal staffing to achieve the goals within 3 months when the epidemic was stable. The green area in the map represented the number of COVID-19 vaccination clinics in each province, the darker the color the more COVID-19 vaccination clinics. The orange bar represented the minimum number of staff needed to be stockpiled for the vaccination step at the vaccination clinics optimized by the simulation model under the goal of raising the booster vaccination rate to the full immunization level in 3 months in different scenarios. The higher the bar, the more people needed to be stocked. The purple bar represented the minimum number of staff to be stocked in the vaccination clinic, and the higher the bar, the higher the number of staff to be stocked. (a,b,c) Optimization when the vaccination clinic was equipped with preview, registration and vaccination steps; (d,e,f) Optimization when the preview and registration steps were combined.
